# Supplementary material for: Direct ab initio molecular dynamics (MD) study of the ionization on a benzene dimer
Source: Royal Society of Chemistry journal article supplement (doi:10.1039/c2ra20246h), 2012-01-01
Supplement: c2ra20246h.pdf [file c2ra20246h.pdf]

## SUPPORTING INFORMATION

### Direct Ab-Initio Molecular Dynamics (MD) Study on the Ionization of Benzene Dimer

Hiroto TACHIKAWA

*Division of Materials Chemistry, Graduate School of Engineering,  
Hokkaido University, Sapporo 060-8628, JAPAN*

#### 1. Spin density on benzene dimer cation

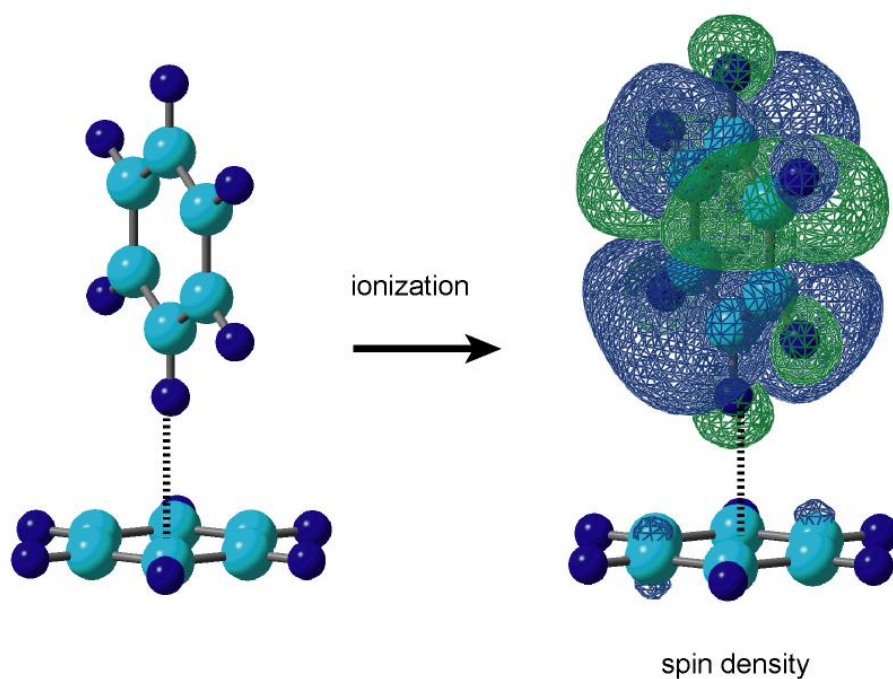

**Figure S1.** Spin density on the benzene dimer cation at vertical ionization point. The calculation was carried out at the MP2/6-31G(d) level of theory.

## 2. Effects of initial structures on the product channel.

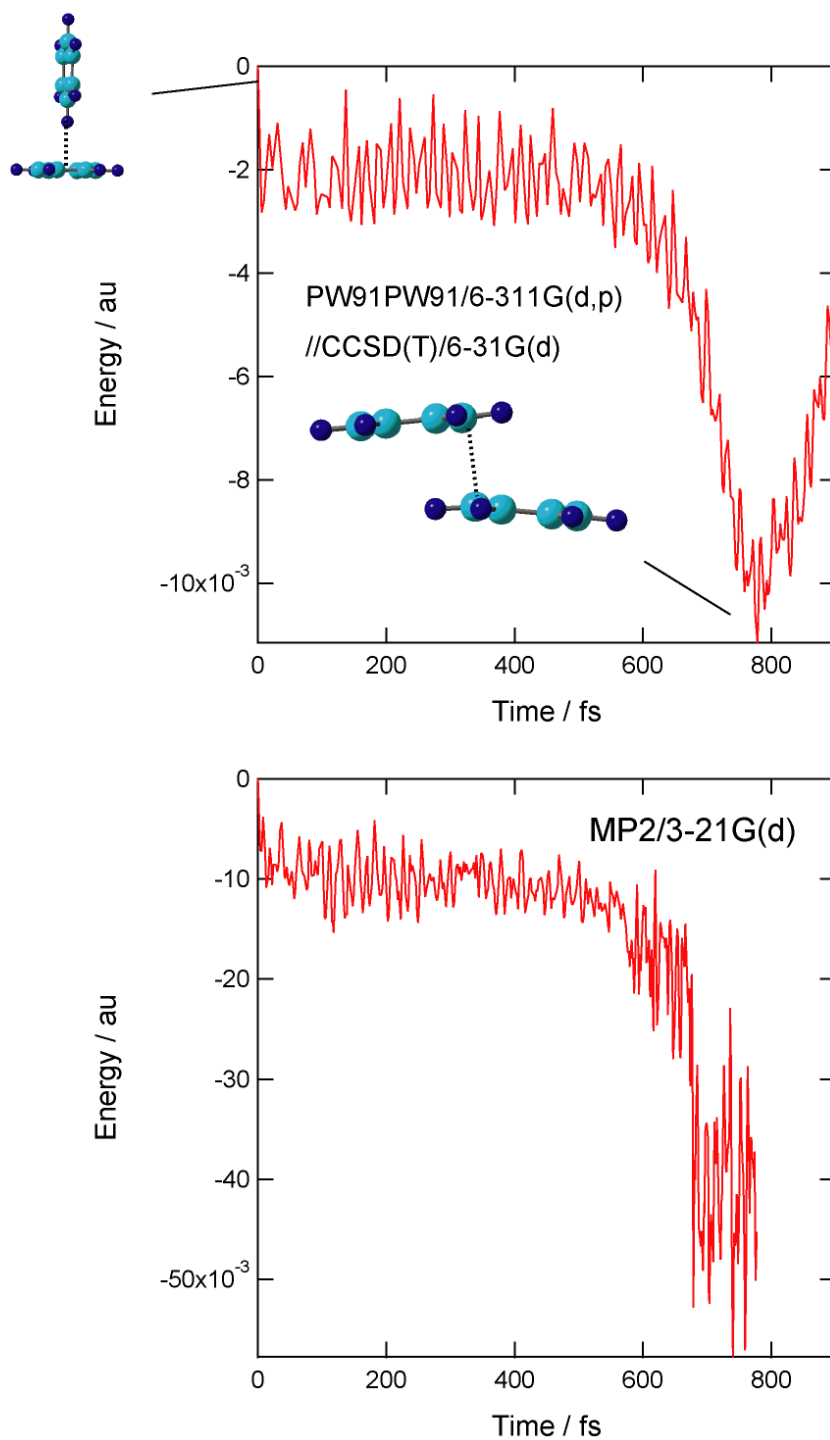

**Figure S2.** Time evolutions of potential energies of the ionization reaction of benzene dimer obtained by direct ab-initio MD calculation.
